# Supplementary material for: Amino acids exchange in patients with CKD as obtained via exome sequencing differ radically from those of natural variants 1000 genome and genomAD databases
Source: Research Square preprint supplement (doi:10.21203/rs.3.rs-3344794/v1), 2023-09-14

Supplementary figure S1. Comparison of the number of mutations verses the probabilistic distribution of aminoacid in human proteome.

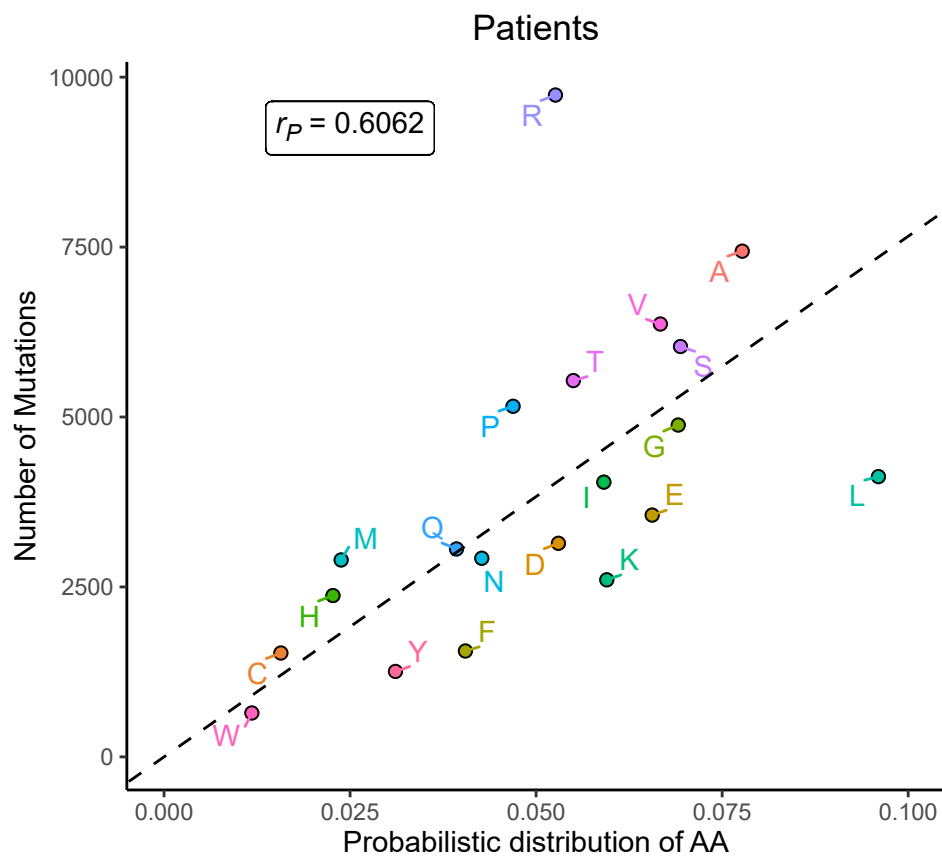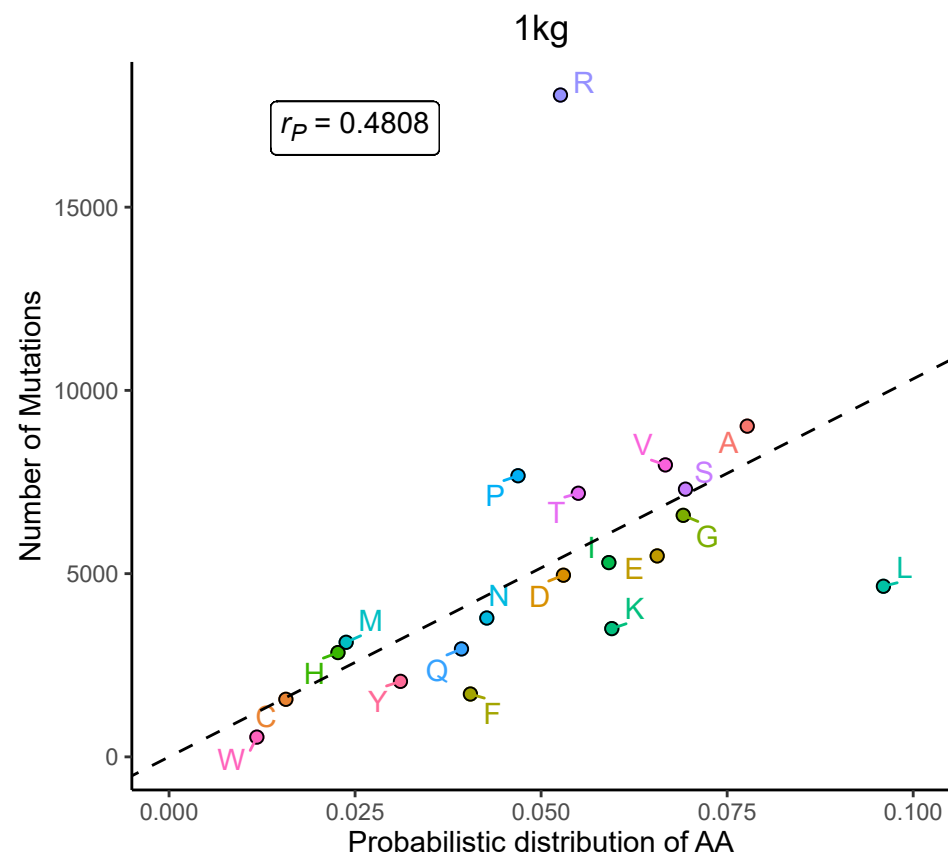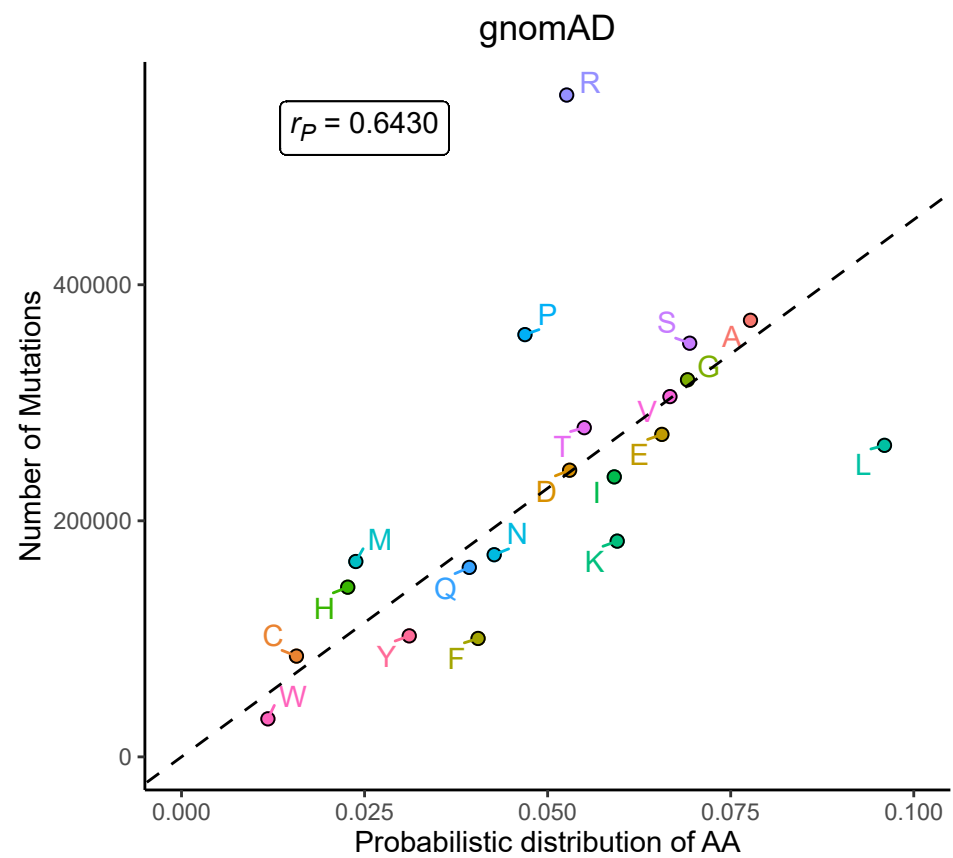

Supplement: Supplementary file 2 [file 4525b2e8dc38ad4d69d78002.pdf]
