# Supplementary material for: Amino acids exchange in patients with CKD as obtained via exome sequencing differ radically from those of natural variants 1000 genome and genomAD databases
Source: Research Square preprint supplement (doi:10.21203/rs.3.rs-3344794/v1), 2023-09-14

Supplementary figure S2. Mutability versus the number of codons in the 1 kG data, genomAD and CKD patients.

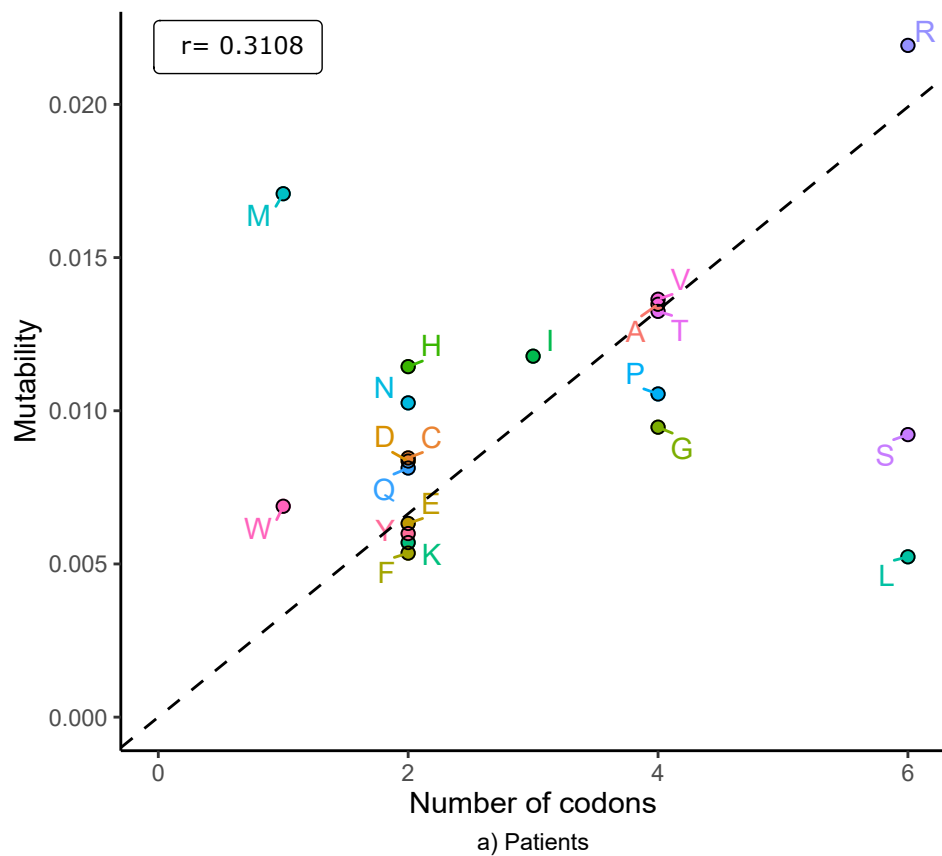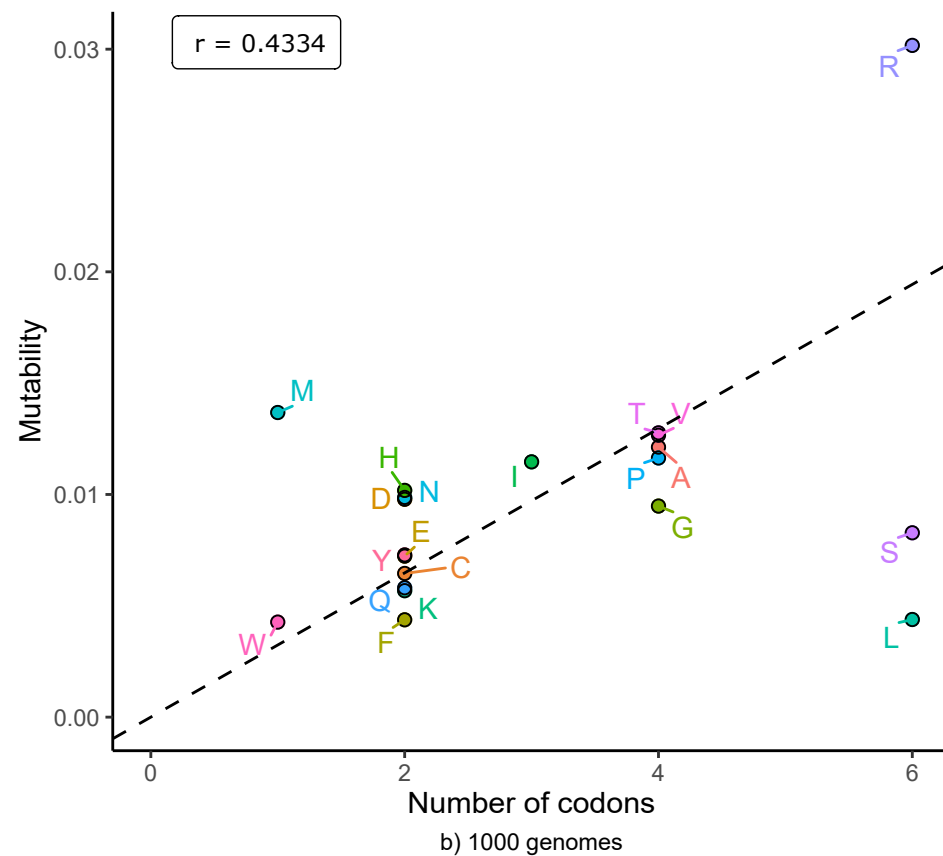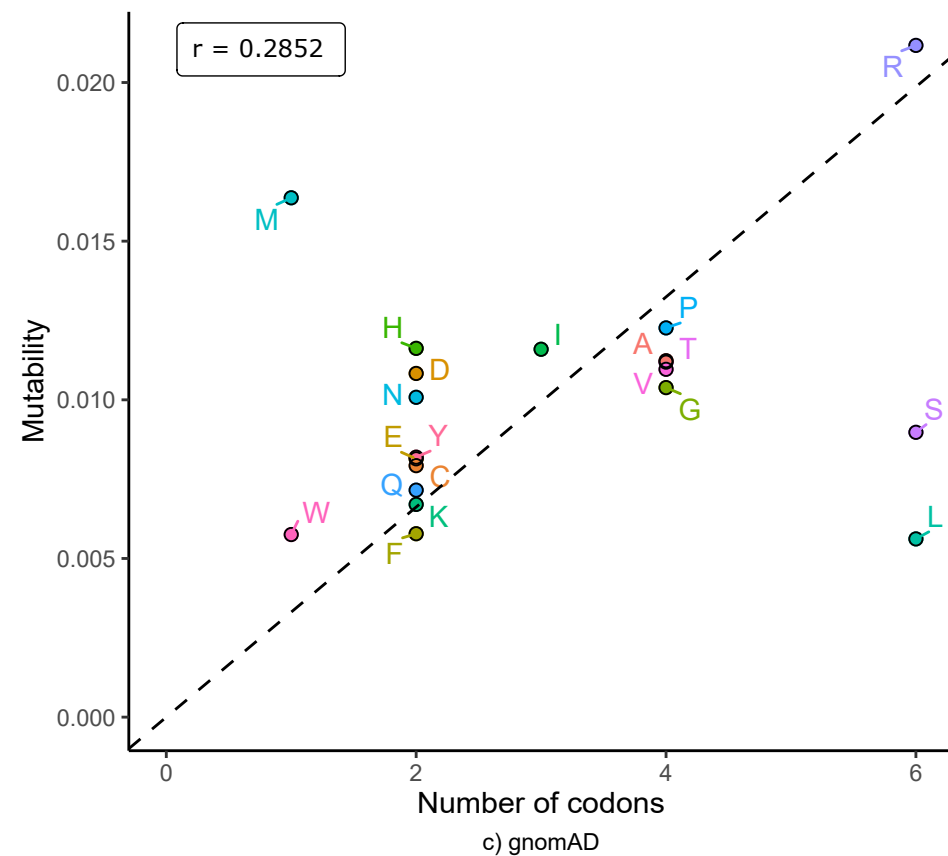

Supplement: Supplementary file 4 [file fd4bbe582bc848d6f74e38b4.pdf]
