# Supplementary figures and images for: Amino acids exchange in patients with CKD as obtained via exome sequencing differ radically from those of natural variants 1000 genome and genomAD databases
Source: Research Square preprint supplement (doi:10.21203/rs.3.rs-3344794/v1), 2023-09-14

Supplementary figure S4. Comparison of mutations versus natural occurrence of Aminoacid.

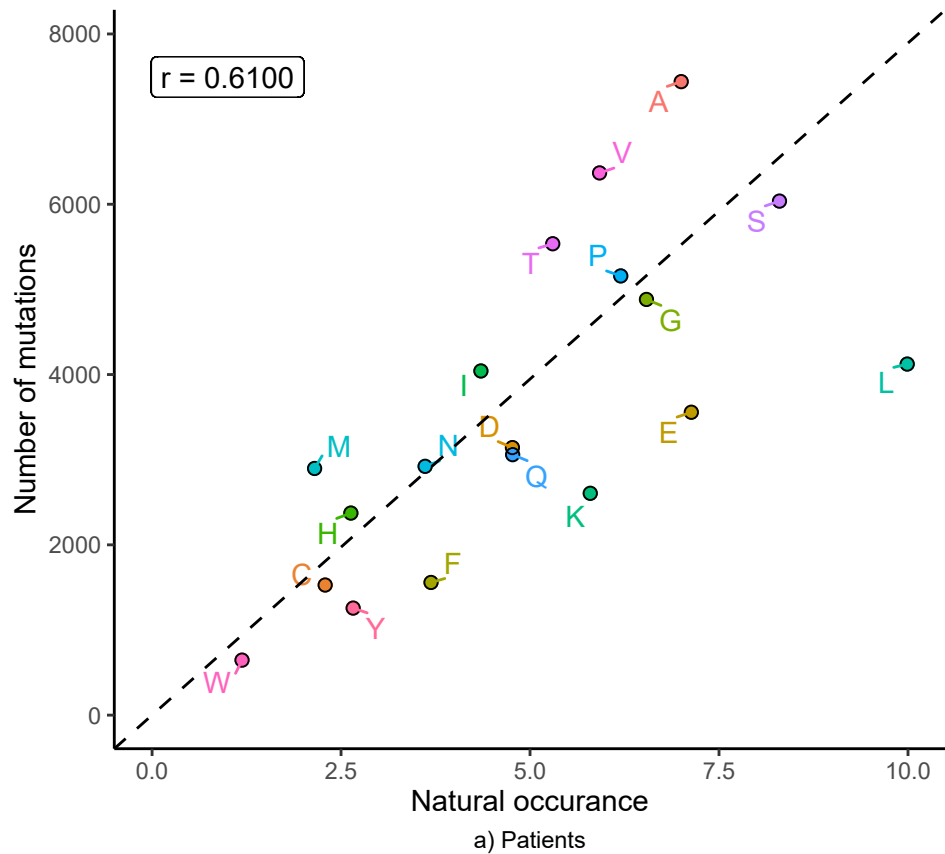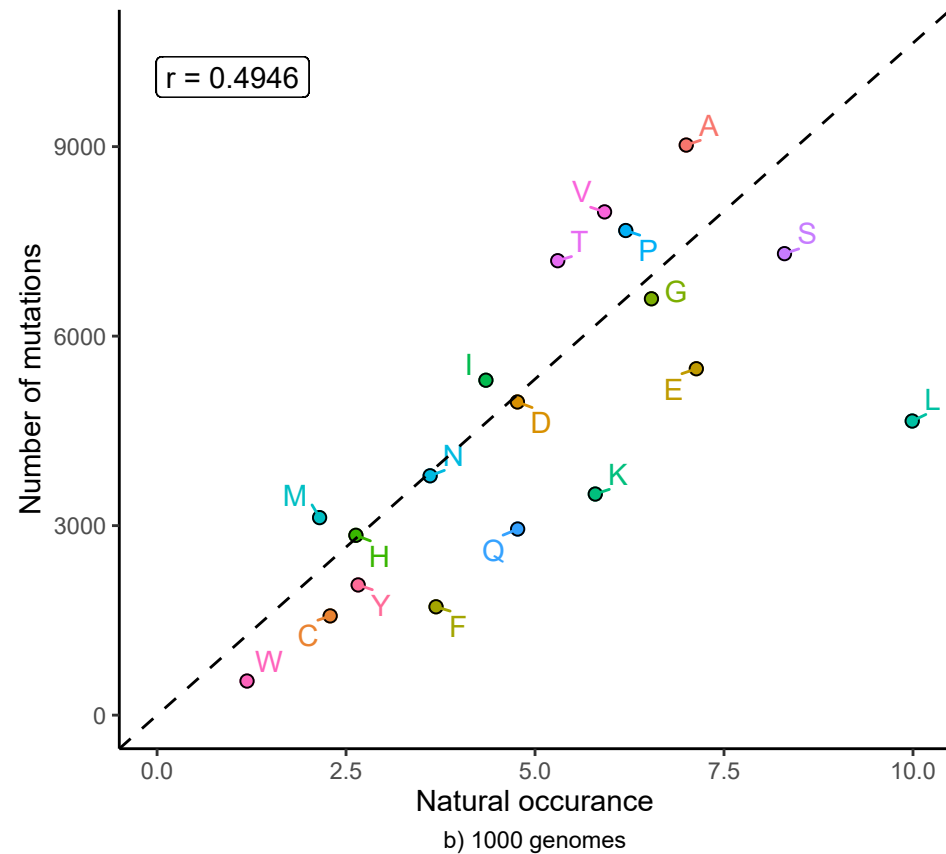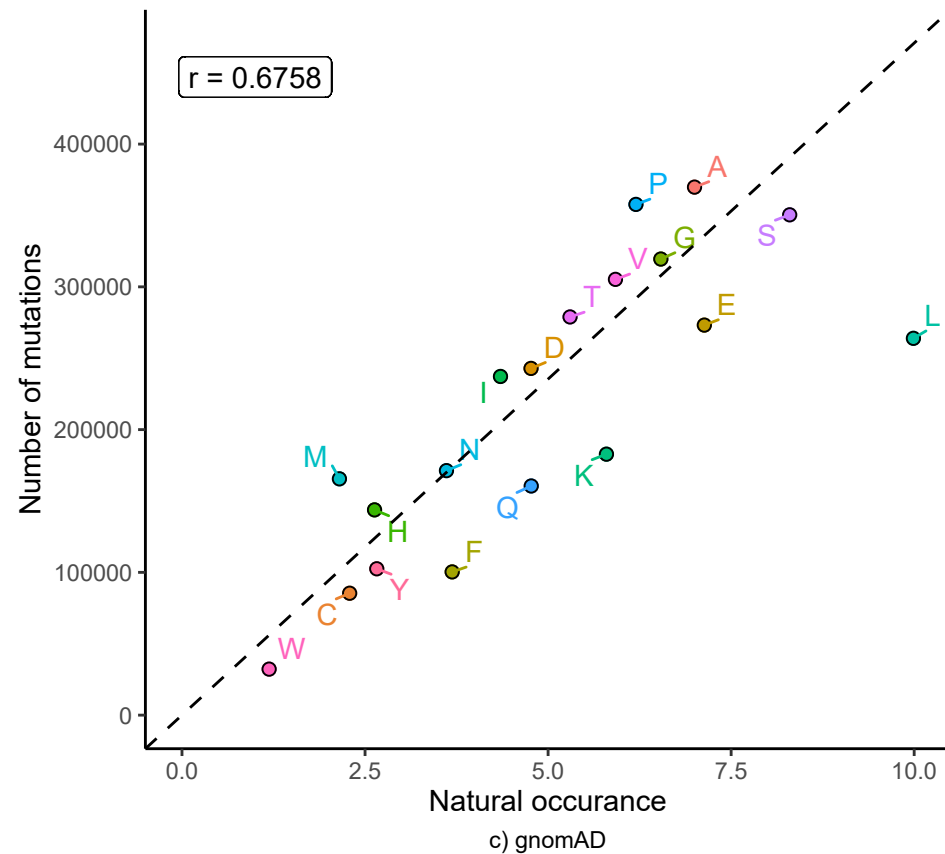

Supplement: Supplementary file 1 [file 255b2f1dbc7965515b5d1366.pdf]

Supplementary figure S3. Comparison of the number of mutations vs mutability among datasets.

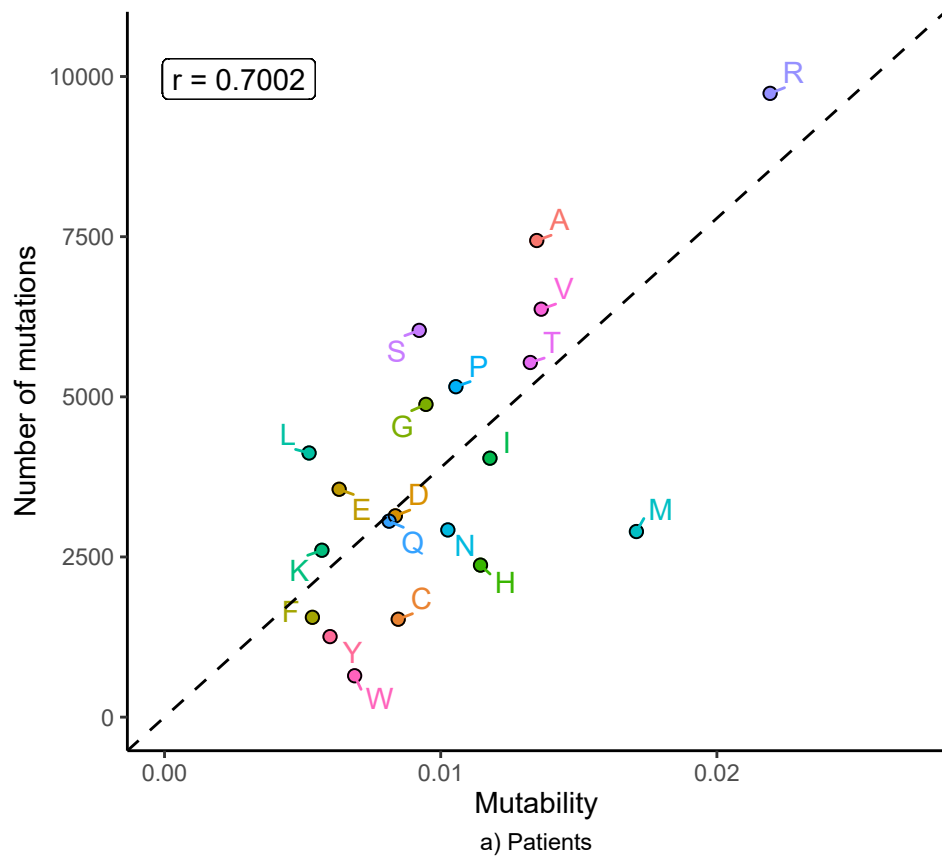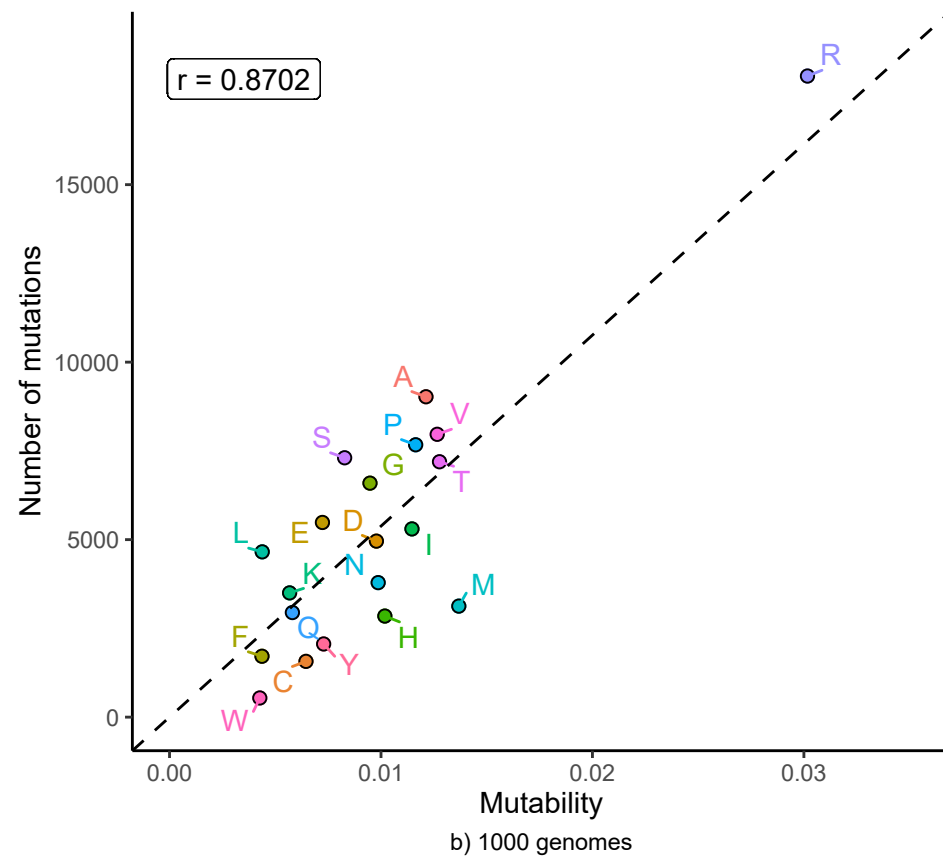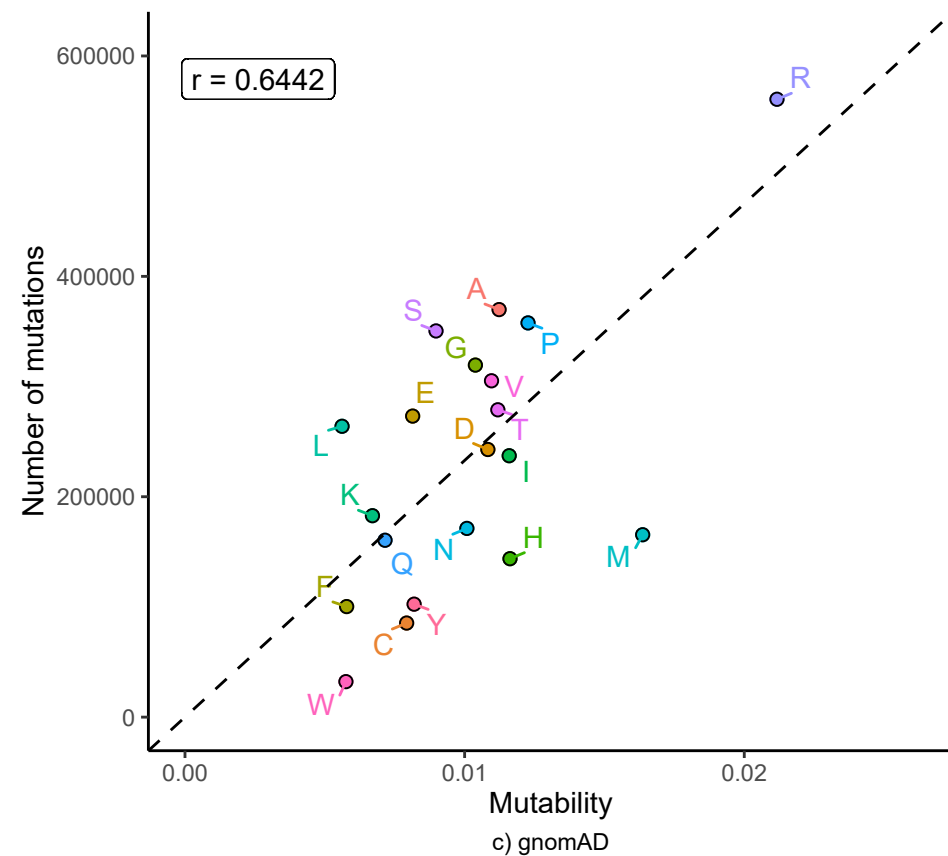

Supplement: Supplementary file 3 [file f0c3b4174b9fb25c9835acee.pdf]
